# Supplementary material for: Assessing the performance of global hydrological models for capturing peak river flows in the Amazon Basin
Source: Copernicus journal article supplement (doi:10.5194/hess-2019-44), 2019-02-27
Supplement: Supplementary file 1 [file hess-2019-44-supplement.pdf]

**Table S1: Characteristics of the 75 hydrological gauging stations used in the analysis. Station numbers correspond to those in Fig. 1. Mean observed discharge is taken from observed values.**

| Station name (number)   | Country | River    | Drainage area (Km <sup>2</sup> ) | Lat    | Lon    | Start      | End        | Mean Q (m <sup>3</sup> s <sup>-1</sup> ) |
|-------------------------|---------|----------|----------------------------------|--------|--------|------------|------------|------------------------------------------|
| Borja (1)               | Peru    | Marañón  | 114232                           | -4.45  | -77.55 | 01/01/1997 | 10/01/2015 | 5122.614                                 |
| San Regis (2)           | Peru    | Marañón  | 356274                           | -4.45  | -73.95 | 01/01/1997 | 29/09/2015 | 17418.04                                 |
| Requena (3)             | Peru    | Ucayali  | 346049                           | -4.75  | -73.65 | 01/07/1996 | 29/09/2015 | 11895.5                                  |
| Tamshiyacu (4)          | Peru    | Solimões | 721521                           | -4.05  | -73.15 | 01/01/1997 | 31/12/2015 | 30205.58                                 |
| Bellavista (5)          | Peru    | Napo     | 100136                           | -3.45  | -73.05 | 01/01/1997 | 29/09/2015 | 6734.2                                   |
| Palmeiras Do Javari (6) | Brazil  | Javari   | 16256                            | -5.15  | -72.85 | 01/01/1997 | 31/12/2015 | 611.3425                                 |
| Foz Do Breu (7)         | Brazil  | Jurua    | 10446                            | -9.45  | -72.75 | 01/01/1997 | 31/12/2015 | 178.0443                                 |
| Santa Maria (8)         | Brazil  | Curuca   | 24351                            | -4.65  | -71.45 | 02/04/1999 | 22/12/2015 | 1009.045                                 |
| Estirao Do Repouso (9)  | Brazil  | Javari   | 62105                            | -4.35  | -70.95 | 02/11/1980 | 31/12/2015 | 2563.211                                 |
| Tabatinga (10)          | Brazil  | Peru     | 874000                           | -4.25  | -69.95 | 01/01/1997 | 31/12/2015 | 36514.11                                 |
| Colocacao Caxias (11)   | Brazil  | Jutai    | 10257                            | -5.55  | -69.15 | 01/01/1997 | 14/07/2011 | 476.0549                                 |
| Envira (12)             | Brazil  | Tarauaca | 48317                            | -7.45  | -70.05 | 01/01/1997 | 16/09/2015 | 1261.317                                 |
| Manouel Urbano (13)     | Brazil  | Purus    | 33693                            | -8.75  | -69.15 | 01/01/1997 | 30/12/2009 | 788.6026                                 |
| Seringal Sao Jose (14)  | Brazil  | Iaco     | 10471                            | -9.75  | -68.85 | 01/01/1997 | 06/12/2012 | 232.0125                                 |
| Rurrenabaque (15)       | Bolivia | Beni     | 70000                            | -14.55 | -67.55 | 01/01/1997 | 31/12/2015 | 2189.476                                 |

| Station name (number)      | Country | River   | Drainage area (Km <sup>2</sup> ) | Lat    | Lon    | Start      | End        | Mean Q (m <sup>3</sup> s <sup>-1</sup> ) |
|----------------------------|---------|---------|----------------------------------|--------|--------|------------|------------|------------------------------------------|
| Pedras Negras (16)         | Bolivia | Guapore | 110000                           | -12.85 | -62.95 | 01/01/1997 | 31/07/2014 | 852.545                                  |
| Guajara-Mirim (17)         | Brazil  | Mamore  | 609000                           | -10.75 | -65.35 | 01/01/1997 | 29/06/2014 | 7810.131                                 |
| Abuna (18)                 | Brazil  | Madeira | 921000                           | -9.75  | -65.35 | 01/01/1997 | 29/06/2014 | 18152.22                                 |
| Floriano Peixoto (19)      | Brazil  | Acre    | 33469                            | -9.05  | -67.35 | 01/01/1997 | 31/12/2015 | 692.1766                                 |
| Valparaiso (20)            | Brazil  | Purus   | 103285                           | -8.65  | -67.35 | 01/01/1997 | 31/12/2015 | 13832.18                                 |
| Seringal Fortaleza (21)    | Brazil  | Purus   | 153016                           | -7.75  | -66.95 | 01/01/1997 | 31/12/2015 | 4003.07                                  |
| Fazenda Borangaba (22)     | Brazil  | Pauini  | 23365                            | -7.55  | -67.55 | 04/01/1997 | 31/12/2015 | 799.6944                                 |
| Santos Dumont (23)         | Brazil  | Jurua   | 142646                           | -6.55  | -68.35 | 01/01/1997 | 31/12/2015 | 4304.748                                 |
| Barreira Alta (24)         | Brazil  | Jutai   | 35880                            | -4.25  | -67.95 | 01/01/1997 | 14/04/2009 | 1641.192                                 |
| Sao Paulo De Olivenca (25) | Brazil  | Amazon  | 990781                           | -3.45  | -68.75 | 01/01/1997 | 30/12/2011 | 47554.85                                 |
| Santo Antonio Do Ica (26)  | Brazil  | Amazon  | 1134540                          | -3.15  | -67.95 | 01/01/1997 | 26/02/2014 | 56355.19                                 |
| Porto Seguro (27)          | Brazil  | Jutai   | 64400                            | -3.35  | -67.55 | 01/01/2008 | 31/12/2015 | 2548.144                                 |
| Estirao Da Santa Cruz (28) | Brazil  | Tefe    | 13708                            | -4.35  | -65.25 | 01/01/1997 | 31/12/2015 | 571.2913                                 |
| Bacaba (29)                | Brazil  | Tapaua  | 38270                            | -6.35  | -64.95 | 01/01/1997 | 31/12/2015 | 1668.033                                 |
| Canutama (30)              | Brazil  | Purus   | 230012                           | -6.55  | -64.45 | 01/01/1997 | 31/12/2015 | 6478.216                                 |
| Labrea (31)                | Brazil  | Purus   | 226351                           | -7.25  | -64.75 | 01/01/1997 | 31/12/2015 | 5639.943                                 |
| Porto Velho (32)           | Brazil  | Madeira | 976000                           | -8.75  | -63.95 | 01/01/1997 | 31/12/2015 | 18485.47                                 |

| Station name (number)      | Country | River                  | Drainage area (Km <sup>2</sup> ) | Lat    | Lon    | Start      | End        | Mean Q (m <sup>3</sup> s <sup>-1</sup> ) |
|----------------------------|---------|------------------------|----------------------------------|--------|--------|------------|------------|------------------------------------------|
| Santa Isabel (33)          | Brazil  | Candeias               | 12600                            | -8.75  | -63.75 | 01/01/1997 | 29/06/2014 | 330.8341                                 |
| Sitio Bela Vista (34)      | Brazil  | Ji-Parana              | 16100                            | -11.65 | -61.15 | 01/01/1997 | 30/07/2014 | 381.4905                                 |
| Fontanilhas (35)           | Brazil  | Juruena                | 55900                            | -11.45 | -58.35 | 01/01/1997 | 29/06/2014 | 1359.172                                 |
| Porto Dos Gauchos (36)     | Brazil  | Arinos                 | 37100                            | -11.55 | -57.45 | 01/01/1997 | 30/05/2014 | 688.1856                                 |
| Porto Roncador (37)        | Brazil  | Teles Pires            | 10800                            | -13.55 | -55.35 | 01/01/1997 | 30/05/2014 | 249.8181                                 |
| Cachoeirao (38)            | Brazil  | Teles Pires/Sao Manuel | 34600                            | -11.55 | -55.65 | 01/01/1997 | 30/07/2014 | 858.4991                                 |
| Humboldt (39)              | Brazil  | Aripuana               | 15200                            | -10.25 | -59.45 | 01/01/1997 | 29/06/2014 | 319.7378                                 |
| Leontino (40)              | Brazil  | Guariba                | 16300                            | -7.85  | -60.55 | 01/01/1997 | 30/12/2011 | 375.8513                                 |
| Boca Do Guariba (41)       | Brazil  | Aripuana               | 70100                            | -7.75  | -60.55 | 01/01/1997 | 30/12/2011 | 1403.749                                 |
| Fazenda Boa Lembranca (42) | Brazil  | Roosevelt              | 59400                            | -7.65  | -60.75 | 01/01/1997 | 30/08/2011 | 1527.78                                  |
| Nova Esperanca (43)        | Brazil  | Marmelos               | 26200                            | -6.55  | -61.75 | 01/01/2009 | 27/02/2014 | 973.4268                                 |
| Manacapuru (44)            | Brazil  | Amazon                 | 2147736                          | -3.35  | -60.65 | 01/01/1997 | 31/12/2015 | 105720                                   |
| Jatuarana (45)             | Brazil  | Amazon                 | 2854286                          | -3.05  | -59.65 | 01/01/1997 | 30/01/2015 | 126994.8                                 |
| Barra Do Sao Manuel (46)   | Brazil  | Tapajos                | 333000                           | -7.35  | -58.15 | 01/01/1997 | 30/03/2014 | 7736.416                                 |
| Tres Marias (47)           | Brazil  | Teles Pires            | 138000                           | -7.65  | -57.95 | 01/01/1997 | 30/03/2014 | 3663.747                                 |
| Santa Rosa (48)            | Brazil  | Teles Pires            | 131000                           | -8.85  | -57.45 | 03/06/2005 | 30/03/2013 | 3646.457                                 |
| Indeco (49)                | Brazil  | Teles Pires            | 52200                            | -10.15 | -55.55 | 01/01/1997 | 09/12/2013 | 1193.669                                 |

| Station name (number)    | Country | River             | Drainage area (Km <sup>2</sup> ) | Lat   | Lon    | Start      | End        | Mean Q (m <sup>3</sup> s <sup>-1</sup> ) |
|--------------------------|---------|-------------------|----------------------------------|-------|--------|------------|------------|------------------------------------------|
| Cajueiro (50)            | Brazil  | Curua             | 35213                            | -5.85 | -54.55 | 01/01/1997 | 08/05/2011 | 784.37                                   |
| Itaituba (51)            | Brazil  | Tapajos           | 458000                           | -4.25 | -55.95 | 01/01/1997 | 31/12/2015 | 11376.96                                 |
| Pedra Do O (52)          | Brazil  | Iriri             | 123827                           | -4.45 | -53.95 | 01/01/1997 | 30/07/2012 | 2413.806                                 |
| Altamira (53)            | Brazil  | Xingu             | 446203                           | -3.35 | -52.15 | 01/01/1997 | 29/04/2014 | 7736.717                                 |
| Sao Francisco (54)       | Brazil  | Jari              | 51343                            | -0.55 | -52.55 | 01/01/1997 | 21/03/2014 | 1218.271                                 |
| Arapari (55)             | Brazil  | Maicuru           | 17072                            | -1.85 | -54.45 | 01/01/1997 | 27/02/2014 | 127.2518                                 |
| Boca Do Inferno (56)     | Brazil  | Curua             | 20803                            | -1.45 | -54.95 | 01/01/1997 | 29/09/2013 | 192.2409                                 |
| Óbidos (57)              | Brazil  | Amazon            | 4680000                          | -1.95 | -55.55 | 01/01/1997 | 31/12/2015 | 178193.9                                 |
| Garganta (58)            | Brazil  | Trombetas         | 37910                            | -0.75 | -56.85 | 01/01/1997 | 29/04/2014 | 1493.961                                 |
| Aldeia Wai-Wai (59)      | Brazil  | Mapuera/Urucurina | 21400                            | -0.65 | -58.05 | 01/01/1997 | 27/02/2013 | 664.3051                                 |
| Cachoeira Morena (60)    | Brazil  | Uatuma            | 20394                            | -2.15 | -59.35 | 02/01/2005 | 30/05/2014 | 673.3568                                 |
| Base Alalau (61)         | Brazil  | Alalau            | 7080                             | -0.65 | -61.35 | 01/01/1997 | 30/05/2014 | 245.8977                                 |
| Caracarai (62)           | Brazil  | Branco            | 124980                           | 1.85  | -61.05 | 01/01/1997 | 31/12/2015 | 3170.343                                 |
| Fe E Esperanca (63)      | Brazil  | Mucajai           | 13658                            | 2.85  | -61.45 | 01/01/1997 | 29/04/2014 | 348.695                                  |
| Fazenda Cajupiranga (64) | Brazil  | Uraricoera        | 35727                            | 3.45  | -61.15 | 01/01/1997 | 30/03/2014 | 635.5902                                 |
| Uaicás (65)              | Brazil  | Uraricoera        | 16065                            | 3.45  | -63.15 | 01/01/1997 | 27/02/2014 | 602.7468                                 |

| Station name (number)             | Country  | River          | Drainage area (Km <sup>2</sup> ) | Lat   | Lon    | Start      | End        | Mean Q (m <sup>3</sup> s <sup>-1</sup> ) |
|-----------------------------------|----------|----------------|----------------------------------|-------|--------|------------|------------|------------------------------------------|
| Posto Ajuricaba (66)              | Brazil   | Demeni         | 14756                            | 0.95  | -62.65 | 01/01/1997 | 29/04/2014 | 550.2058                                 |
| Serrinha (67)                     | Brazil   | Negro          | 279945                           | -0.45 | -64.95 | 01/01/1997 | 31/12/2015 | 16845.52                                 |
| Acanaui (68)                      | Brazil   | Caqueta/Japura | 242259                           | -1.85 | -66.65 | 01/01/1997 | 31/12/2015 | 14399.93                                 |
| Jusante Da Cachoeira Do Caju (69) | Brazil   | Curicuriari    | 10228                            | -0.25 | -67.05 | 01/01/1997 | 30/03/2014 | 937.4047                                 |
| Sao Felipe (70)                   | Brazil   | Negro          | 110862                           | 0.45  | -67.35 | 01/01/1997 | 29/04/2014 | 8314.548                                 |
| Cucui (71)                        | Brazil   | Negro          | 61781                            | 1.35  | -66.85 | 01/01/1997 | 29/04/2014 | 5113.101                                 |
| Missao Icana (72)                 | Brazil   | Icana          | 22282                            | 1.15  | -67.65 | 01/01/1997 | 30/03/2014 | 1902.729                                 |
| Taraqua (73)                      | Brazil   | Vaupes         | 44732                            | 0.15  | -68.55 | 01/01/1997 | 29/04/2014 | 2665.905                                 |
| Uaracu (74)                       | Brazil   | Vaupes         | 40506                            | 0.45  | -69.15 | 01/01/1997 | 29/11/2011 | 2415.104                                 |
| Vila Bittencourt (75)             | Colombia | Caqueta/Japura | 197136                           | -1.35 | -69.45 | 01/01/1997 | 31/12/2015 | 2188.119                                 |

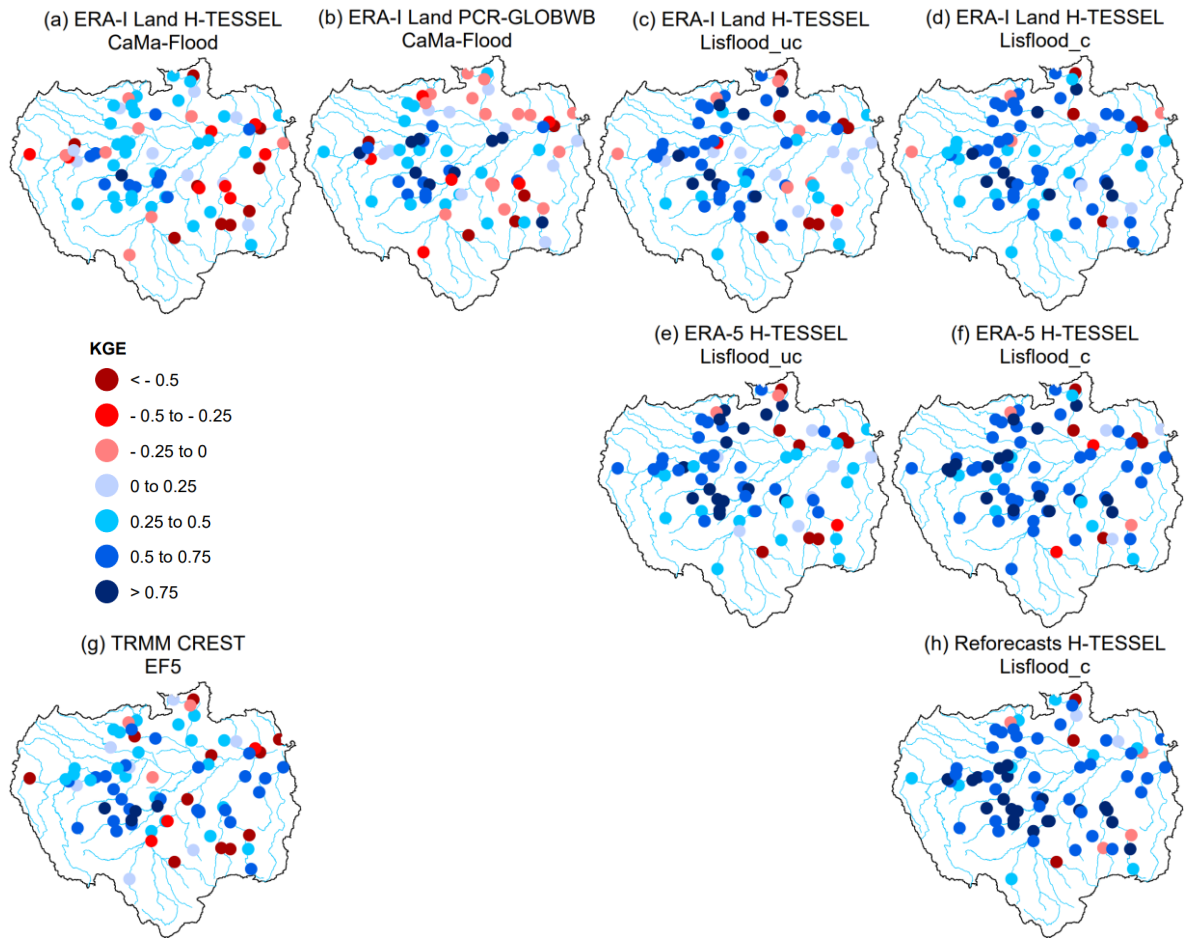

**Figure S1: Full KGE scores at 75 hydrological gauging stations for all simulations (2004-2015). Scores greater than zero are considered skilful (i.e. blue circles).**

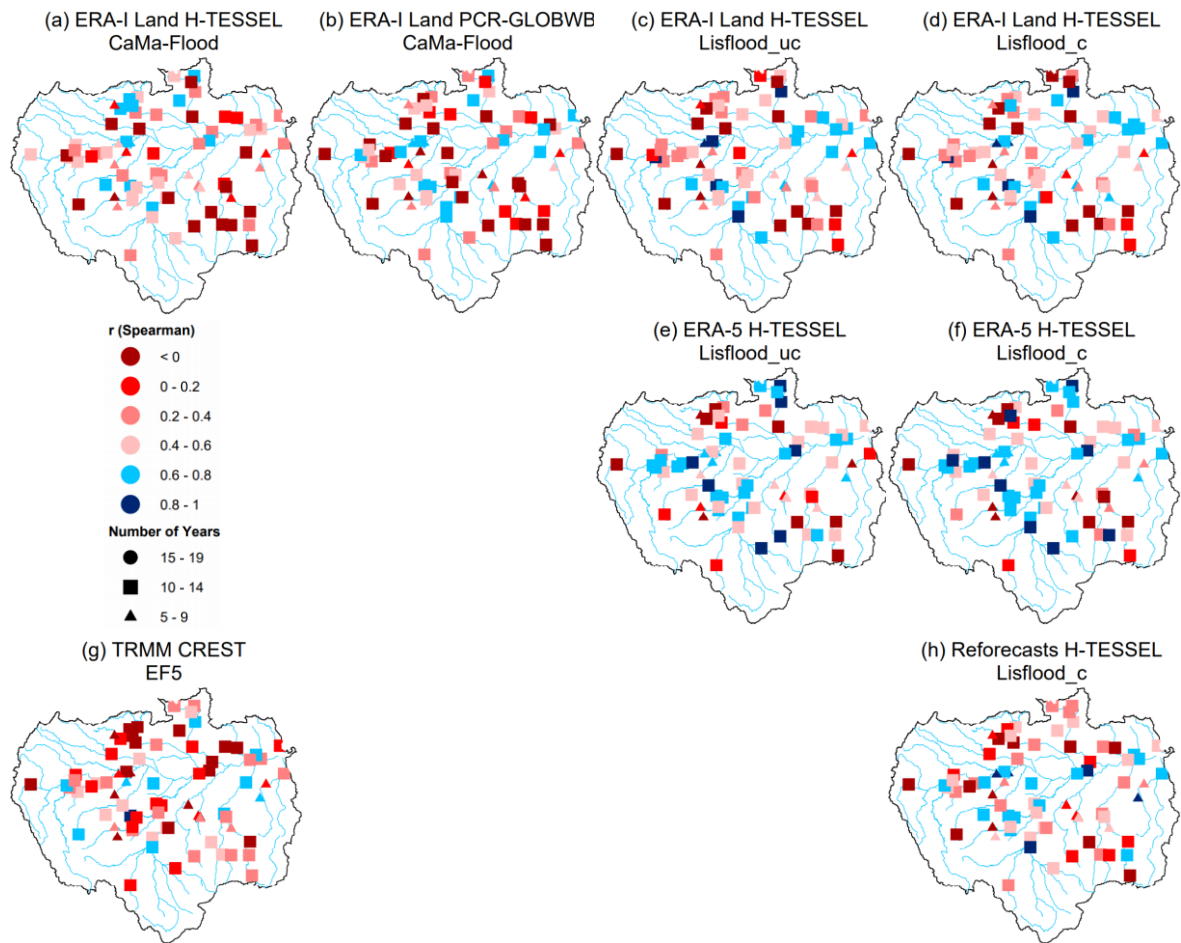

**Figure S2: Spearman ranked correlation coefficients for observed against simulated annual maximum discharge at 75 hydrological gauging stations for all simulations (2004-2015). Values exceeding 0.6 are considered skillful (i.e. blue shapes). Number of overlapping years of data between observations and simulations are denoted by different shapes (e.g. circle for 15-19 years of overlapping data).**
